# Supplementary material for: Insights on the Hypoglycemic Potential of Crocus sativus Tepal Polyphenols: An In Vitro and In Silico Study
Source: Int J Mol Sci. 2023 May 24;24(11):9213. doi: 10.3390/ijms24119213 (PMC10252962; doi:10.3390/ijms24119213)
Supplement: Supplementary file 1 [file ijms-24-09213-s001.zip]

Archive with 5 entries (5 files):
- Figure S1.pdf
- Figure S2.pdf
- Figure S3.pdf
- Supplementary Table S1- Phenolic compounds.xlsx
- Supplementary Table S2.pdf
