# Supplementary material for: Insights on the Hypoglycemic Potential of Crocus sativus Tepal Polyphenols: An In Vitro and In Silico Study
Source: Int J Mol Sci. 2023 May 24;24(11):9213. doi: 10.3390/ijms24119213 (PMC10252962; doi:10.3390/ijms24119213)
Supplement: Supplementary file 1 [file ijms-24-09213-s001.zip › Figure S2.pdf]

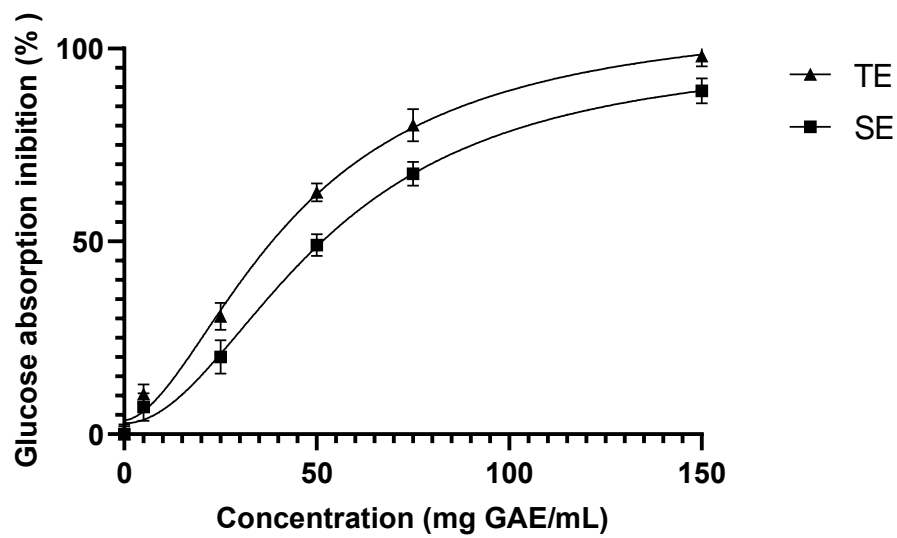

**Figure S2:** Glucose absorption inhibition curves of stigma (SE) and tepal (TE) extracts in Caco-2 differentiated cells.
