# Supplementary material for: Insights on the Hypoglycemic Potential of Crocus sativus Tepal Polyphenols: An In Vitro and In Silico Study
Source: Int J Mol Sci. 2023 May 24;24(11):9213. doi: 10.3390/ijms24119213 (PMC10252962; doi:10.3390/ijms24119213)
Supplement: Supplementary file 1 [file ijms-24-09213-s001.zip › Supplementary Table S1- Phenolic compounds.xlsx]

## Sheet: SFRN1
Supplemetary Table S1: Metabolomic profiling of C.Sativus tepal extract (TE) by high-resolution mass spectrometry
	96 PHENOLIC COMPOUNDS (mass tolerance 2ppm)
	FLAVONOIDS
		ANTHOCYANINS
		ID	Name	Molecular Weight	Synonyms	Chemical Formula	CAS Number	ChEBI ID	PubChem ID		featureidx	maxint
		748	4-O-Methyldelphinidin 3-O-D-glucoside	479.411		C22H23O12					4	12895.9
		19	Cyanidin	287.244	3,5,7,3',4'-Pentahydroxyflavylium	C15H11O6	13306-05-3	27843	128861		5	65386.7
		71	Cyanidin 3,5-O-diglucoside	611.525		C27H31O16			441688		7	5527.48
		62	Cyanidin 3-O-xylosyl-rutinosidea	727.641		C32H39O19					3	2452.81
		8	Cyanidin 3-O-galactoside	449.385	Ideain	C21H21O11		27475	441699			25674.9
		9	Cyanidin 3-O-glucoside	449.385	Kuromanin	C21H21O11	7084-24-4	28426	25244576			56783.1
		10	Cyanidin 3-O-rutinoside	595.526	Keracyanin ; Cyanidin 3-O-rhamnosyl-glucoside	C27H31O15		28064	441674			334521
		31	Delphinidin-3-O-glucosylglucoside	627.522		C27H31O17	58213-36-8		5316496		8	555679
		29	Delphinidin 3-O-arabinoside	435.358		C20H19O11			25087690		10	32858.5
		28	Delphinidin 3-O-glucoside	465.384		C21H21O12			165558		18	556778
		49	Delphinidin 3-O-rutinoside	611.525		C27H31O16	15674-58-5		5492231			45209.1
		12	Pelargonidin 3-O-glucoside	433.385		C21H21O10	18466-51-8	31967	9867509		19	40998.8
		22	Pelargonidin 3-O-sophoroside	595.526		C27H31O15			23724704		15	7579.28
		738	Peonidin 3-O-(2-O-(6-O-(E)-caffeoyl-D-glucosyl)-D-glucoside)-5-O-D-glucoside	949.835		C43H49O24					16	589631
		739	Peonidin 3-O-sophoroside	625.552		C28H33O16					53	12953.6
		16	Peonidin 3-O-rutinoside	609.553		C28H33O15						67893
		740	Peonidin 3-O-sambubioside	595.526		C27H31O15						98056.9
		33	Petunidin 3-O-glucoside	479.411		C22H23O12	6988-81-4		176449		59	10233.3
		17	Malvidin-3,5-o-diglucoside	655.624		C29H37O17			441765		55	102779
		36	Malvidin 3-O-glucoside	493.437		C23H25O12	7228-78-6		443652			88067
		DIHYDROCHALCONES
		ID	Name	Molecular Weight	Synonyms	Chemical Formula	CAS Number	ChEBI ID	PubChem ID
		108	Phloretin	274.269	4,2',4',6'-Tetrahydroxydihydrochalcone	C15H14O5	60-82-2	17276	4788		43	48090.7
		762	Phloretin 2'-O-glucuronide	450.393		C21H22O11					49	11370.2
		FLAVONOLS
		ID	Name	Molecular Weight	Synonyms	Chemical Formula	CAS Number	ChEBI ID	PubChem ID
		124	(+)-Catechin	290.268	3,5,7,3',4'-Pentahydroxyflavane	C15H14O6	154-23-4	15600	9064		24	11603.6
		121	catechin-3-O-gallate	442.421		C22H18O10			44257105		23	223877
		128	(-)-Epicatechin 3-O-gallate	442.372		C22H18O10	1257-08-5					56987
		127	(-)-Epigallocatechin	306.267		C15H14O7	970-74-1	42255	72277
		786	(-)-Epigallocatechin 3'-O-glucuronide	482.392		C21H22O13
		787	(-)-Epigallocatechin 7-O-glucuronide	482.392		C21H22O13
		125	(-)-Epicatechin	290.268	3,5,7,3',4'-Pentahydroxyflavane	C15H14O6	490-46-0	28466	72276		11	29802.8
		128	(-)-Epicatechin 3-O-gallate	442.372		C22H18O10	1257-08-5				8	23242.8
		768	Epicatechin 3'-O-glucuronide	466.392		C21H22O12					60	41222.6
		785	Epicatechin 7-O-glucuronide	466.392		C21H22O12					61	4454.22
		776	Epigallocatechin 3-O-gallate-7-O-glucoside-4''-O-glucuronide	796.636		C34H36O22					144	10106.1
		133	Theaflavin	564.494		C29H24O12	4670-05-7		114777		180	3787.38
		123	Quercetin-3-o-acetylrhamnoside	490.442		C23H22O12			6324952		198	111872
		167	Dihydroquercetin	304.251		C15H12O7	480-18-2		439533		177	234790
		ISOFLAVONOIDS
		ID	Name	Molecular Weight	Synonyms	Chemical Formula	CAS Number	ChEBI ID	PubChem ID
		912	Butin	272.253		C15H12O5			92775		18	41554.8
		854	Calycosin	284.263		C16H12O5			5280448		104	76640.6
		911	Sativanone	300.306		C17H16O5			5321142		88	13945.9
		916	Stevenin	284.263		C16H12O5					39	46649.5
		890	Tectoridin	462.404		C22H22O11			5281810		123	9556.69
		889	Tectorigenin	300.263		C16H12O6			5281811		122	7458.69
		789	Luteolin	286.236		C15H10O6			5280445		148	567897
		903	3'-Hydroxygenistein	286.236		C15H10O6						134980
		913	3'-Hydroxymelanettin	300.263		C16H12O6			5318262			778906
		901	3'-O-Methylequol	272.296		C16H16O4						89564.4
		920	3'-O-Methylviolanone	330.332		C18H18O6			10019512			123988
		833	4',6,7-Trihydroxyisoflavanone	272.253		C15H12O5			125100			99759.3
	PHENOLIC ACIDS
		HYDROXIBENZOIC ACIDS
		ID	Name	Molecular Weight	Synonyms	Chemical Formula	CAS Number	ChEBI ID	PubChem ID
		413	Gallic acid	170.12	3,4,5-Trihydroxybenzoic acid	C7H6O5	149-91-7	30778	370		31	20314.7
		439	Gallic acid ethyl ester	198.173	Ethyl gallate	C9H10O5					127	28015
		925	Punicalin	782.525		C34H22O22			5388496		136	49407.7
		420	Syringic acid	198.173	3,5-Dimethoxy-4-hydroxybenzoic acid	C9H10O5	530-57-4		10742		134	20177.9
		414	Vanillic acid	168.147	4-Hydroxy-3-methoxybenzoic acid ; p-Vanillic acid	C8H8O4	121-34-6	30816	8468		142	7477.04
		1055	Vanillic acid 4-sulfate	248.21		C8H8O7S					137	5260.34
		429	3-Hydroxybenzoic acid	138.121	m-Hydroxybenzoic acid	C7H6O3	99-06-9	30764	7420			769846
		927	3-Hydroxyhippuric acid	195.172		C9H9NO4			450268			998879
		922	3-O-Methylgallic acid	184.146	Methyl-3-O-gallic acid	C8H8O5			19829			345789
		418	4-Hydroxybenzoic acid	138.121	p-Hydroxybenzoic acid	C7H6O3	99-96-7	30763	135			673889
		HYDROXICINNAMIC ACIDS
		ID	Name	Molecular Weight	Synonyms	Chemical Formula	CAS Number	ChEBI ID	PubChem ID
		527	4,5-Dicaffeoylquinic acid	516.451		C25H24O12					130	5188.81
		457	Caffeic acid	180.157	3,4-Dihydroxycinnamic acid	C9H8O4	331-39-5	17395	689043		32	9478.35
		945	Caffeic acid 3-O-glucuronide	356.281		C15H16O10					150	15474.8
		940	Caffeic acid 4-sulfate	260.221		C9H8O7S					152	27139.9
		459	Ferulic acid	194.184	3-Methoxy-4-Hydroxycinnamic acid ; 3-Methylcaffeic acid ; Coniferic acid	C10H10O4	1135-24-6	17620	709		151	86517.1
		939	Ferulic acid 4-O-glucuronide	370.308		C16H18O10					149	67251.9
		485	Isoferulic acid	194.184	4-Methoxy-3-Hydroxycinnamic acid ; 4-Methylcaffeic acid	C10H10O4	537-73-5		736186		133	3785.35
		454	p-Coumaric acid	164.158	p-Hydroxycinnamic acid	C9H8O3	7400-08-0	36090	322		132	10941.2
		461	Rosmarinic acid	360.315		C18H16O8	537-15-5	17226	5281792		148	62601.8
		464	Sinapic acid	224.21	3,5-Dimethoxy-4-hydroxycinnamic acid ; Sinapate ; Synapoic acid ; Sinapinic acid	C11H12O5	530-59-6	15714	10743		162	89013.5
		937	Isoferulic acid 3-sulfate	274.247		C10H10O7S						776010
		944	Isoferuloyl C1-glucuronide	370.308		C16H18O10						78092.7
		463	m-Coumaric acid	164.158	m-Hydroxycinnamic acid	C9H8O3	588-30-7	18176	637541			607699
		HYDROXYPHENILPROPANOIC ACIDS
		ID	Name	Molecular Weight	Synonyms	Chemical Formula	CAS Number	ChEBI ID	PubChem ID
		975	3-Phenylpropionic acid	150.174		C9H10O2			107		14	10467.7
		978	4-Hydroxyphenyl-2-propionic acid	166.174		C9H10O3					89	23132.5
		971	Danshensu	198.173	3,4-Dihydroxyphenyllactic acid	C9H10O5			152463		128	4212.7
		968	Dihydrosinapic acid	226.226		C11H14O5					102	20510.3
		974	Hydroxydanshensu	214		C9H10O6					57	47442.6
		967	Dihydroferulic acid 4-O-glucuronide	372.324		C16H20O10						2.39844e+06
		962	Dihydroferulic acid 4-sulfate	276.263		C10H12O7S						49877.8
		974	Hydroxydanshensu	214		C9H10O6						184997
	STILBENES
		STILBENES
		ID	Name	Molecular Weight	Synonyms	Chemical Formula	CAS Number	ChEBI ID	PubChem ID
		1008	Dihydroresveratrol	230.259		C14H14O3			185914		168	5249.59
		592	Resveratrol	228.243	3,5,4'-Trihydroxystilbene	C14H12O3	501-36-0	27881	445154		153	67835.4
		1000	Resveratrol 3-sulfate	308.306		C14H12O6S					169	21234.5
		1006	trans-Resveratrol 4'-O-glucuronide	404.367		C20H20O9					190	4938.45
		1005	trans-Resveratrol 3-sulfate	308.306		C14H12O6S						790890
		1006	trans-Resveratrol 4'-O-glucuronide	404.367		C20H20O9						121445
		997	cis-Resveratrol 4'-O-glucuronide	404.367		C20H20O9						39122.3
	OTHER POLYPHENOLS
		OTHER POLYPHENOLS
		ID	Name	Molecular Weight	Synonyms	Chemical Formula	CAS Number	ChEBI ID	PubChem ID
		724	Vanillin	152.147	4-Hydroxy-3-methoxy-benzoic aldehyde ; Methylprotocatechuic aldehyde ; Vanillic aldehyde ; p-Vanillin	C8H8O3	121-33-5	18346	1183		181	31759.4
		1057	2,4-Dihydroxyacetophenone 5-sulfate	232.211		C8H8O6S					139	10539.1
		1058	2-Hydroxy-4-methoxyacetophenone 5-sulfate	262.237		C9H10O7S					20	7248.1
		1060	Norathyriol	260.199	1,3,6,7-Tetrahydroxyxanthone	C13H8O6			12272		112	11091.5
		677	Oleuropein	540.514	3,4-DHPEA-Elenolic acid glucoside	C25H32O13	32619-42-4		5281544		173	90539.9
		673	Tyrosol	138.164	p-HPEA ; 4-(2-Hydroxyethyl)phenol ; 2-(4-Hydroxyphenyl)ethanol ; 2,4-Hydroxyphenyl-ethyl-alcohol ; 4-Hydroxyphenylethanol	C8H10O2	501-94-0		10393		178	32242.9
		1050	Tyrosol 4-sulfate	218.227		C8H10O5S					172	4786.46
		1039	Urolithin B 3-O-glucuronide	388.325		C19H16O9						34424.5
		1040	Urolithin C	244.2	Hydroxyurolithin A	C13H8O5						804513
